# Supplementary material
Source: Springer Nature journal article supplement (https://www.springermedizin.de/resource/supplementary/13023_2011_332_MOESM4_ESM.pdf/9642134)

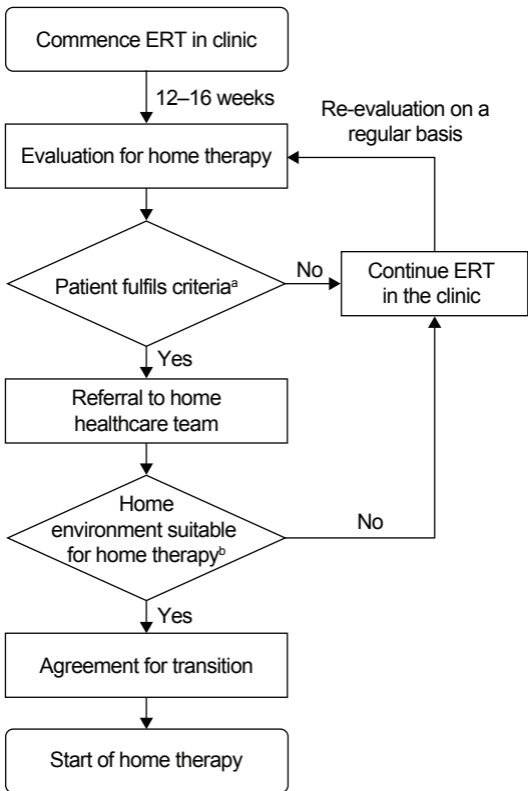

Key

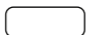

= Start/finish

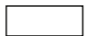

= Next step in transition

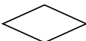

= Decision point

Supplement: MOESM4 [file 9642134]
